# Supplementary material for: Human Ovarian Reserve from Conception to the Menopause
Source: PubMed Central journal article supplement (PMC2811725; doi:10.1371/journal.pone.0008772), 2010-01-27
Supplement: pone.0008772.s001.pdf [file pone.0008772.s001.pdf]

# Asymmetric peak function comparison

Rank 1 Eqn 8058 ADC\_(a,b,c,d,e)  
r<sup>2</sup>=0.815 DF Adj r<sup>2</sup>=0.812 FitStdErr=0.469 Fstat=364  
a=5.56 b=25.6 c=52.7  
d=0.0736 e=24.5

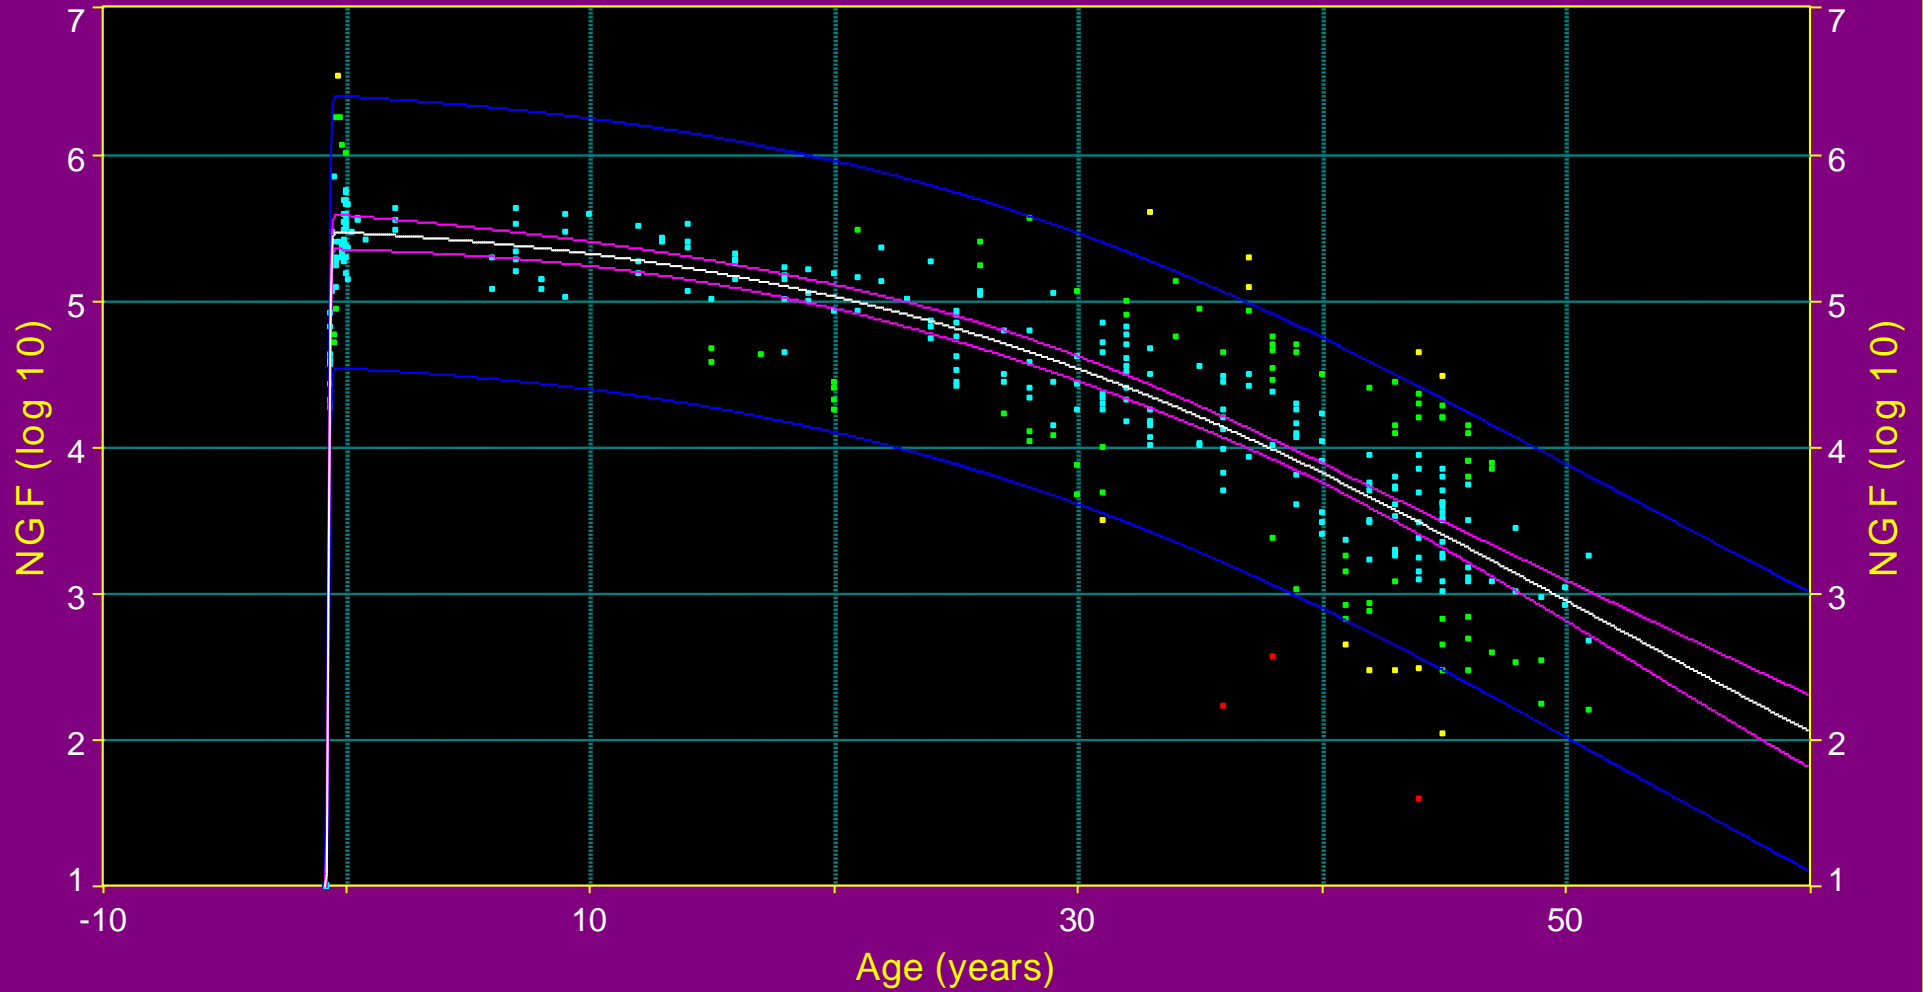

Rank 1 Eqn 8058 ADC\_(a,b,c,d,e)

r<sup>2</sup> Coef Det      DF Adj r<sup>2</sup>      Fit Std Err      F-value  
0.8149677513    0.8121642324    0.4685812354    364.46933930

| Parm | Value       | Std Error   | t-value     | 95% Confidence Limits |             | P> t    |
|------|-------------|-------------|-------------|-----------------------|-------------|---------|
| a    | 5.564115648 | 0.091411466 | 60.86890292 | 5.384294961           | 5.743936335 | 0.00000 |
| b    | 25.63253000 | 0.390602477 | 65.62306057 | 24.86415368           | 26.40090631 | 0.00000 |
| c    | 52.66953996 | 0.782200033 | 67.33512875 | 51.13082984           | 54.20825007 | 0.00000 |
| d    | 0.073591444 | 0.005823061 | 12.63793194 | 0.062136571           | 0.085046317 | 0.00000 |
| e    | 24.47368229 | 2.093805220 | 11.68861462 | 20.35483912           | 28.59252547 | 0.00000 |

Area Xmin-Xmax      Area Precision

|               |              |               |              |
|---------------|--------------|---------------|--------------|
| 236.72241175  | 1.200998e-12 |               |              |
| Function min  | X-Value      | Function max  | X-Value      |
| 2.8697690156  | 51.000000000 | 5.4739437290  | -0.406399719 |
| 1st Deriv min | X-Value      | 1st Deriv max | X-Value      |
| -0.090629102  | 51.000000000 | 29.685409287  | -0.702257763 |
| 2nd Deriv min | X-Value      | 2nd Deriv max | X-Value      |
| -0.000930544  | 1.8192307692 | -0.000146363  | 51.000000000 |

|                         |                       |              |              |
|-------------------------|-----------------------|--------------|--------------|
| Procedure               | Minimization          | Iterations   |              |
| LevMarqdt               | Least Squares         | 32           |              |
| r <sup>2</sup> Coef Det | DF Adj r <sup>2</sup> | Fit Std Err  | Max Abs Err  |
| 0.8149677513            | 0.8121642324          | 0.4685812354 | 1.8957426254 |

r<sup>2</sup> Attainable  
0.8623295057

| Source   | Sum of Squares | DF  | Mean Square | F Statistic | P>F     |
|----------|----------------|-----|-------------|-------------|---------|
| Regr     | 320.10376      | 4   | 80.02594    | 364.469     | 0.00000 |
| Error    | 72.677132      | 331 | 0.21956837  |             |         |
| Total    | 392.78089      | 335 |             |             |         |
| Lack Fit | 18.602792      | 71  | 0.26201116  | 1.2598      | 0.10031 |
| Pure Err | 54.07434       | 260 | 0.20797823  |             |         |

# Asymmetric peak function comparison

Rank 1 Eqn 8058 ADC\_(a,b,c,d,e)  
 $r^2=0.815$  DF Adj  $r^2=0.812$  FitStdErr=0.469 Fstat=364  
a=5.56 b=25.6 c=52.7  
d=0.0736 e=24.5

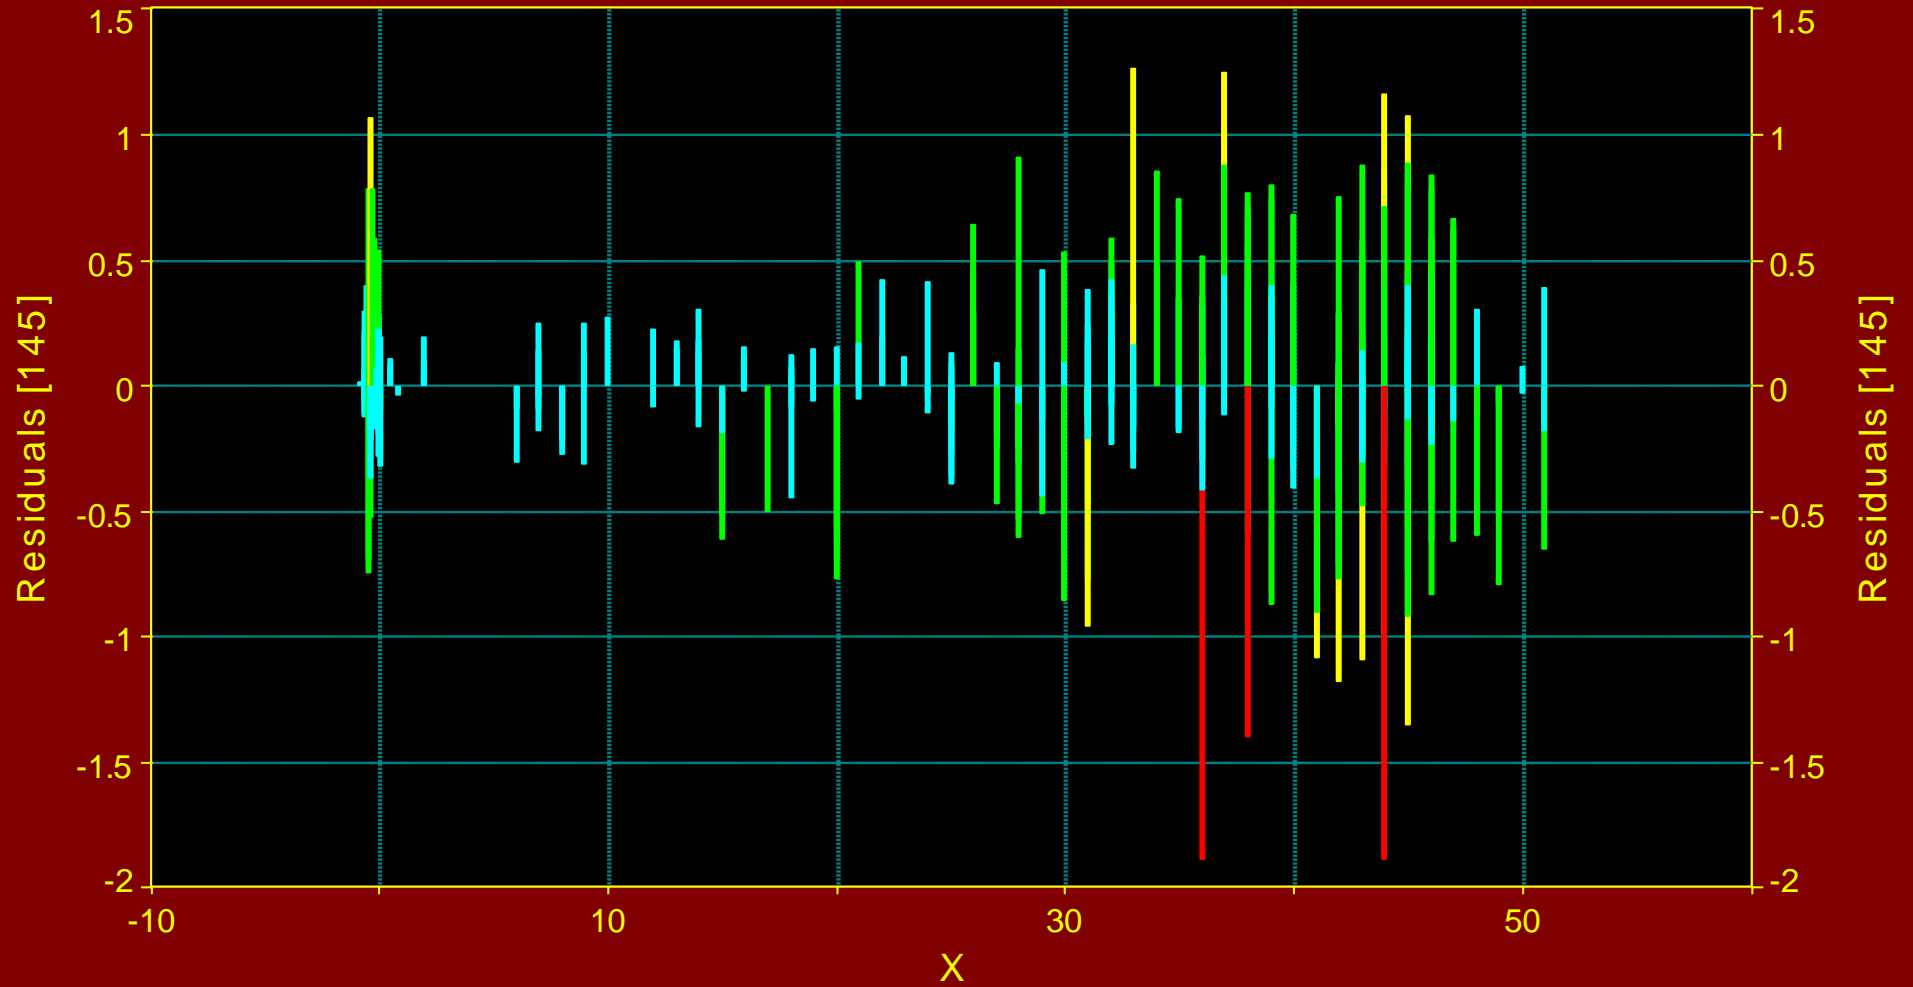

| Rank 1 | Eqn 8058  | ADC_(a,b,c,d,e) |           |           | Residual  | Residual% | 95% Confidence Limits |           | 95% Prediction Limits |   | Weights |
|--------|-----------|-----------------|-----------|-----------|-----------|-----------|-----------------------|-----------|-----------------------|---|---------|
| XY     | * X Value | Y Value         | Y Predict |           |           |           |                       |           |                       |   |         |
| 1      | -0.769231 | 1.0000000       | 0.9932161 | 0.0067839 | 0.6783875 | 0.7164350 | 1.2699973             | 0.0307854 | 1.9556468             | 1 |         |
| 2      | -0.769231 | 1.0000000       | 0.9932161 | 0.0067839 | 0.6783875 | 0.7164350 | 1.2699973             | 0.0307854 | 1.9556468             | 1 |         |
| 3      | -0.769231 | 1.0000000       | 0.9932161 | 0.0067839 | 0.6783875 | 0.7164350 | 1.2699973             | 0.0307854 | 1.9556468             | 1 |         |
| 4      | -0.769231 | 1.0000000       | 0.9932161 | 0.0067839 | 0.6783875 | 0.7164350 | 1.2699973             | 0.0307854 | 1.9556468             | 1 |         |
| 5      | -0.769231 | 1.0000000       | 0.9932161 | 0.0067839 | 0.6783875 | 0.7164350 | 1.2699973             | 0.0307854 | 1.9556468             | 1 |         |
| 6      | -0.769231 | 1.0000000       | 0.9932161 | 0.0067839 | 0.6783875 | 0.7164350 | 1.2699973             | 0.0307854 | 1.9556468             | 1 |         |
| 7      | -0.769231 | 1.0000000       | 0.9932161 | 0.0067839 | 0.6783875 | 0.7164350 | 1.2699973             | 0.0307854 | 1.9556468             | 1 |         |
| 8      | -0.769231 | 1.0000000       | 0.9932161 | 0.0067839 | 0.6783875 | 0.7164350 | 1.2699973             | 0.0307854 | 1.9556468             | 1 |         |
| 9      | -0.769231 | 1.0000000       | 0.9932161 | 0.0067839 | 0.6783875 | 0.7164350 | 1.2699973             | 0.0307854 | 1.9556468             | 1 |         |
| 10     | -0.769231 | 1.0000000       | 0.9932161 | 0.0067839 | 0.6783875 | 0.7164350 | 1.2699973             | 0.0307854 | 1.9556468             | 1 |         |
| 11     | -0.769231 | 1.0000000       | 0.9932161 | 0.0067839 | 0.6783875 | 0.7164350 | 1.2699973             | 0.0307854 | 1.9556468             | 1 |         |
| 12     | -0.640110 | 4.3259465       | 4.3850191 | -0.059073 | -1.365542 | 4.0775423 | 4.6924959             | 3.4133160 | 5.3567222             | 1 |         |
| 13     | -0.640110 | 4.2660199       | 4.3850191 | -0.118999 | -2.789466 | 4.0775423 | 4.6924959             | 3.4133160 | 5.3567222             | 1 |         |
| 14     | -0.637363 | 4.3103746       | 4.4412022 | -0.130828 | -3.035179 | 4.1377622 | 4.7446423             | 3.4707689 | 5.4116356             | 1 |         |
| 15     | -0.637363 | 4.6328014       | 4.4412022 | 0.1915991 | 4.1357079 | 4.1377622 | 4.7446423             | 3.4707689 | 5.4116356             | 1 |         |
| 16     | -0.637363 | 4.4271127       | 4.4412022 | -0.014090 | -0.318256 | 4.1377622 | 4.7446423             | 3.4707689 | 5.4116356             | 1 |         |
| 17     | -0.626374 | 4.5935962       | 4.6476199 | -0.054024 | -1.176066 | 4.3637031 | 4.9315366             | 3.6831129 | 5.6121269             | 1 |         |
| 18     | -0.623626 | 4.5703094       | 4.6946144 | -0.124305 | -2.719837 | 4.4163360 | 4.9728927             | 3.7317520 | 5.6574767             | 1 |         |
| 19     | -0.612637 | 4.9150303       | 4.8643464 | 0.0506839 | 1.0312014 | 4.6109543 | 5.1177386             | 3.9083796 | 5.8203133             | 1 |         |
| 20     | -0.609890 | 4.8269619       | 4.9023078 | -0.075346 | -1.560938 | 4.6555806 | 5.1490350             | 3.9480860 | 5.8565297             | 1 |         |
| 21     | -0.601648 | 5.0604863       | 5.0058897 | 0.0545966 | 1.0788803 | 4.7797291 | 5.2320504             | 4.0567777 | 5.9550018             | 1 |         |
| 22     | -0.583333 | 5.4747988       | 5.1851070 | 0.2896918 | 5.2913695 | 5.0039815 | 5.3662325             | 4.2457075 | 6.1245065             | 1 |         |
| 23     | -0.582418 | 5.4041492       | 5.1923941 | 0.2117551 | 3.9183807 | 5.0133715 | 5.3714167             | 4.2533978 | 6.1313904             | 1 |         |
| 24     | -0.500000 | 5.8516252       | 5.4585527 | 0.3930725 | 6.7173219 | 5.3457853 | 5.5713201             | 4.5299077 | 6.3871977             | 1 |         |
| 25     | -0.480769 | 4.7150335       | 5.4676200 | -0.752587 | -15.96142 | 5.3527976 | 5.5824423             | 4.5387232 | 6.3965167             | 1 |         |
| 26     | -0.442308 | 4.7742906       | 5.4733039 | -0.699013 | -14.64120 | 5.3561353 | 5.5904724             | 4.5441142 | 6.4024936             | 1 |         |
| 27     | -0.416667 | 6.2525132       | 5.4739120 | 0.7786012 | 12.452613 | 5.3563203 | 5.5915037             | 4.5446688 | 6.4031551             | 1 |         |
| 28     | -0.403846 | 4.9446208       | 5.4739422 | -0.529321 | -10.70499 | 5.3562915 | 5.5915928             | 4.5446915 | 6.4031928             | 1 |         |
| 29     | -0.403846 | 5.0953019       | 5.4739422 | -0.378640 | -7.431165 | 5.3562915 | 5.5915928             | 4.5446915 | 6.4031928             | 1 |         |
| 30     | -0.384615 | 5.2458087       | 5.4738592 | -0.228051 | -4.347290 | 5.3562058 | 5.5915126             | 4.5446082 | 6.4031102             | 1 |         |
| 31     | -0.384615 | 5.2952613       | 5.4738592 | -0.178598 | -3.372787 | 5.3562058 | 5.5915126             | 4.5446082 | 6.4031102             | 1 |         |
| 32     | -0.384615 | 5.2708255       | 5.4738592 | -0.203034 | -3.852028 | 5.3562058 | 5.5915126             | 4.5446082 | 6.4031102             | 1 |         |
| 33     | -0.333000 | 6.5334924       | 5.4734251 | 1.0600673 | 16.225125 | 5.3559270 | 5.5909232             | 4.5441938 | 6.4026564             | 1 |         |
| 34     | -0.288462 | 5.4009919       | 5.4730139 | -0.072022 | -1.333495 | 5.3556819 | 5.5903459             | 4.5438036 | 6.4022242             | 1 |         |
| 35     | -0.250000 | 6.2564050       | 5.4726563 | 0.7837487 | 12.527141 | 5.3554692 | 5.5898435             | 4.5434643 | 6.4018484             | 1 |         |
| 36     | -0.166667 | 5.3283796       | 5.4718774 | -0.143498 | -2.693086 | 5.3550045 | 5.5887504             | 4.5427250 | 6.4010299             | 1 |         |
| 37     | -0.166667 | 5.2944662       | 5.4718774 | -0.177411 | -3.350880 | 5.3550045 | 5.5887504             | 4.5427250 | 6.4010299             | 1 |         |
| 38     | -0.166667 | 6.0564475       | 5.4718774 | 0.5845700 | 9.6520283 | 5.3550045 | 5.5887504             | 4.5427250 | 6.4010299             | 1 |         |
| 39     | -0.125000 | 5.3692159       | 5.4714859 | -0.102270 | -1.904747 | 5.3547701 | 5.5882016             | 4.5423531 | 6.4006186             | 1 |         |
| 40     | -0.125000 | 5.3201463       | 5.4714859 | -0.151340 | -2.844651 | 5.3547701 | 5.5882016             | 4.5423531 | 6.4006186             | 1 |         |

|    |            |           |           |           |           |           |           |           |           |   |
|----|------------|-----------|-----------|-----------|-----------|-----------|-----------|-----------|-----------|---|
| 41 | -0.115385  | 5.5332050 | 5.4713953 | 0.0618097 | 1.1170688 | 5.3547158 | 5.5880748 | 4.5422671 | 6.4005234 | 1 |
| 42 | -0.0833333 | 5.4149733 | 5.4710929 | -0.056120 | -1.036376 | 5.3545344 | 5.5876513 | 4.5419799 | 6.4002058 | 1 |
| 43 | -0.0833333 | 5.4031205 | 5.4710929 | -0.067972 | -1.258020 | 5.3545344 | 5.5876513 | 4.5419799 | 6.4002058 | 1 |
| 44 | -0.038462  | 5.6824898 | 5.4706680 | 0.2118218 | 3.7276233 | 5.3542790 | 5.5870571 | 4.5415763 | 6.3997598 | 1 |
| 45 | -0.038462  | 5.5874584 | 5.4706680 | 0.1167904 | 2.0902234 | 5.3542790 | 5.5870571 | 4.5415763 | 6.3997598 | 1 |
| 46 | -0.038462  | 5.4871030 | 5.4706680 | 0.0164350 | 0.2995201 | 5.3542790 | 5.5870571 | 4.5415763 | 6.3997598 | 1 |
| 47 | -0.038462  | 5.5383550 | 5.4706680 | 0.0676870 | 1.2221497 | 5.3542790 | 5.5870571 | 4.5415763 | 6.3997598 | 1 |
| 48 | -0.038462  | 5.2673243 | 5.4706680 | -0.203344 | -3.860475 | 5.3542790 | 5.5870571 | 4.5415763 | 6.3997598 | 1 |
| 49 | 0.0000000  | 5.1846914 | 5.4703026 | -0.285611 | -5.508740 | 5.3540589 | 5.5865463 | 4.5412290 | 6.3993761 | 1 |
| 50 | 0.0000000  | 5.3636120 | 5.4703026 | -0.106691 | -1.989156 | 5.3540589 | 5.5865463 | 4.5412290 | 6.3993761 | 1 |
| 51 | 0.0000000  | 5.3783979 | 5.4703026 | -0.091905 | -1.708774 | 5.3540589 | 5.5865463 | 4.5412290 | 6.3993761 | 1 |
| 52 | 0.0000000  | 5.2988531 | 5.4703026 | -0.171450 | -3.235596 | 5.3540589 | 5.5865463 | 4.5412290 | 6.3993761 | 1 |
| 53 | 0.0000000  | 5.7458552 | 5.4703026 | 0.2755526 | 4.7956763 | 5.3540589 | 5.5865463 | 4.5412290 | 6.3993761 | 1 |
| 54 | 0.0000000  | 5.5301997 | 5.4703026 | 0.0598971 | 1.0830914 | 5.3540589 | 5.5865463 | 4.5412290 | 6.3993761 | 1 |
| 55 | 0.0000000  | 5.7551123 | 5.4703026 | 0.2848097 | 4.9488120 | 5.3540589 | 5.5865463 | 4.5412290 | 6.3993761 | 1 |
| 56 | 0.0000000  | 6.0050947 | 5.4703026 | 0.5347921 | 8.9056397 | 5.3540589 | 5.5865463 | 4.5412290 | 6.3993761 | 1 |
| 57 | 0.0000000  | 5.4996871 | 5.4703026 | 0.0293845 | 0.5342941 | 5.3540589 | 5.5865463 | 4.5412290 | 6.3993761 | 1 |
| 58 | 0.0000000  | 5.5910646 | 5.4703026 | 0.1207620 | 2.1599112 | 5.3540589 | 5.5865463 | 4.5412290 | 6.3993761 | 1 |
| 59 | 0.0000000  | 5.5831988 | 5.4703026 | 0.1128962 | 2.0220701 | 5.3540589 | 5.5865463 | 4.5412290 | 6.3993761 | 1 |
| 60 | 0.0000000  | 5.6646420 | 5.4703026 | 0.1943394 | 3.4307446 | 5.3540589 | 5.5865463 | 4.5412290 | 6.3993761 | 1 |
| 61 | 0.0000000  | 5.6893089 | 5.4703026 | 0.2190063 | 3.8494356 | 5.3540589 | 5.5865463 | 4.5412290 | 6.3993761 | 1 |
| 62 | 0.0000000  | 5.5403295 | 5.4703026 | 0.0700269 | 1.2639482 | 5.3540589 | 5.5865463 | 4.5412290 | 6.3993761 | 1 |
| 63 | 0.0833330  | 5.3655460 | 5.4695066 | -0.103961 | -1.937558 | 5.3535778 | 5.5854353 | 4.5404724 | 6.3985407 | 1 |
| 64 | 0.0833330  | 5.6611025 | 5.4695066 | 0.1915959 | 3.3844274 | 5.3535778 | 5.5854353 | 4.5404724 | 6.3985407 | 1 |
| 65 | 0.0833330  | 5.1426397 | 5.4695066 | -0.326867 | -6.356013 | 5.3535778 | 5.5854353 | 4.5404724 | 6.3985407 | 1 |
| 66 | 0.2500000  | 5.4633995 | 5.4678972 | -0.004498 | -0.082325 | 5.3525992 | 5.5831953 | 4.5389415 | 6.3968529 | 1 |
| 67 | 0.5000000  | 5.5445740 | 5.4654393 | 0.0791347 | 1.4272453 | 5.3510887 | 5.5797899 | 4.5366008 | 6.3942779 | 1 |
| 68 | 0.5000000  | 5.5693739 | 5.4654393 | 0.1039346 | 1.8661805 | 5.3510887 | 5.5797899 | 4.5366008 | 6.3942779 | 1 |
| 69 | 0.8333333  | 5.4197906 | 5.4620790 | -0.042288 | -0.780260 | 5.3489936 | 5.5751644 | 4.5333954 | 6.3907627 | 1 |
| 70 | 2.0000000  | 5.5465427 | 5.4495399 | 0.0970027 | 1.7488865 | 5.3408837 | 5.5581962 | 4.5213852 | 6.3776947 | 1 |
| 71 | 2.0000000  | 5.4888820 | 5.4495399 | 0.0393420 | 0.7167584 | 5.3408837 | 5.5581962 | 4.5213852 | 6.3776947 | 1 |
| 72 | 2.0000000  | 5.6378648 | 5.4495399 | 0.1883249 | 3.3403584 | 5.3408837 | 5.5581962 | 4.5213852 | 6.3776947 | 1 |
| 73 | 6.0000000  | 5.2922561 | 5.3962208 | -0.103965 | -1.964468 | 5.3020218 | 5.4904197 | 4.4696472 | 6.3227943 | 1 |
| 74 | 6.0000000  | 5.0827854 | 5.3962208 | -0.313435 | -6.166607 | 5.3020218 | 5.4904197 | 4.4696472 | 6.3227943 | 1 |
| 75 | 7.0000000  | 5.2833012 | 5.3800693 | -0.096768 | -1.831584 | 5.2890731 | 5.4710655 | 4.4538159 | 6.3063227 | 1 |
| 76 | 7.0000000  | 5.3283796 | 5.3800693 | -0.051690 | -0.970083 | 5.2890731 | 5.4710655 | 4.4538159 | 6.3063227 | 1 |
| 77 | 7.0000000  | 5.5185139 | 5.3800693 | 0.1384446 | 2.5087302 | 5.2890731 | 5.4710655 | 4.4538159 | 6.3063227 | 1 |
| 78 | 7.0000000  | 5.6283889 | 5.3800693 | 0.2483196 | 4.4119129 | 5.2890731 | 5.4710655 | 4.4538159 | 6.3063227 | 1 |
| 79 | 7.0000000  | 5.1947918 | 5.3800693 | -0.185278 | -3.566602 | 5.2890731 | 5.4710655 | 4.4538159 | 6.3063227 | 1 |
| 80 | 8.0000000  | 5.1398791 | 5.3626588 | -0.222780 | -4.334338 | 5.2745987 | 5.4507189 | 4.4366892 | 6.2886283 | 1 |
| 81 | 8.0000000  | 5.1397249 | 5.3626588 | -0.222934 | -4.337468 | 5.2745987 | 5.4507189 | 4.4366892 | 6.2886283 | 1 |
| 82 | 8.0000000  | 5.0791812 | 5.3626588 | -0.283478 | -5.581166 | 5.2745987 | 5.4507189 | 4.4366892 | 6.2886283 | 1 |

|     |           |           |           |           |           |           |           |           |           |   |
|-----|-----------|-----------|-----------|-----------|-----------|-----------|-----------|-----------|-----------|---|
| 83  | 9.000000  | 5.0218258 | 5.3439224 | -0.322097 | -6.413933 | 5.2584804 | 5.4293644 | 4.4181981 | 6.2696466 | 1 |
| 84  | 9.000000  | 5.5932861 | 5.3439224 | 0.2493637 | 4.4582685 | 5.2584804 | 5.4293644 | 4.4181981 | 6.2696466 | 1 |
| 85  | 9.000000  | 5.4653829 | 5.3439224 | 0.1214605 | 2.2223602 | 5.2584804 | 5.4293644 | 4.4181981 | 6.2696466 | 1 |
| 86  | 10.000000 | 5.5943926 | 5.3237926 | 0.2705999 | 4.8369845 | 5.2406033 | 5.4069820 | 4.3982736 | 6.2493117 | 1 |
| 87  | 12.000000 | 5.5041744 | 5.2790835 | 0.2250910 | 4.0894595 | 5.1991562 | 5.3590107 | 4.3538519 | 6.2043150 | 1 |
| 88  | 12.000000 | 5.1875207 | 5.2790835 | -0.091563 | -1.765058 | 5.1991562 | 5.3590107 | 4.3538519 | 6.2043150 | 1 |
| 89  | 12.000000 | 5.2718416 | 5.2790835 | -0.007242 | -0.137368 | 5.1991562 | 5.3590107 | 4.3538519 | 6.2043150 | 1 |
| 90  | 13.000000 | 5.3961993 | 5.2543697 | 0.1418296 | 2.6283249 | 5.1754105 | 5.3333289 | 4.3292213 | 6.1795181 | 1 |
| 91  | 13.000000 | 5.4281348 | 5.2543697 | 0.1737651 | 3.2011935 | 5.1754105 | 5.3333289 | 4.3292213 | 6.1795181 | 1 |
| 92  | 14.000000 | 5.5289167 | 5.2279949 | 0.3009218 | 5.4426901 | 5.1495616 | 5.3064282 | 4.3028912 | 6.1530986 | 1 |
| 93  | 14.000000 | 5.4031205 | 5.2279949 | 0.1751256 | 3.2411941 | 5.1495616 | 5.3064282 | 4.3028912 | 6.1530986 | 1 |
| 94  | 14.000000 | 5.3638056 | 5.2279949 | 0.1358107 | 2.5319837 | 5.1495616 | 5.3064282 | 4.3028912 | 6.1530986 | 1 |
| 95  | 14.000000 | 5.0594820 | 5.2279949 | -0.168513 | -3.330635 | 5.1495616 | 5.3064282 | 4.3028912 | 6.1530986 | 1 |
| 96  | 15.000000 | 4.6720979 | 5.1998944 | -0.527797 | -11.29678 | 5.1215677 | 5.2782210 | 4.2747997 | 6.1249890 | 1 |
| 97  | 15.000000 | 4.5797836 | 5.1998944 | -0.620111 | -13.54018 | 5.1215677 | 5.2782210 | 4.2747997 | 6.1249890 | 1 |
| 98  | 15.000000 | 5.0058495 | 5.1998944 | -0.194045 | -3.876363 | 5.1215677 | 5.2782210 | 4.2747997 | 6.1249890 | 1 |
| 99  | 16.000000 | 5.1405143 | 5.1700051 | -0.029491 | -0.573693 | 5.0914063 | 5.2486039 | 4.2448874 | 6.0951228 | 1 |
| 100 | 16.000000 | 5.3201047 | 5.1700051 | 0.1500996 | 2.8213660 | 5.0914063 | 5.2486039 | 4.2448874 | 6.0951228 | 1 |
| 101 | 16.000000 | 5.2833012 | 5.1700051 | 0.1132961 | 2.1444192 | 5.0914063 | 5.2486039 | 4.2448874 | 6.0951228 | 1 |
| 102 | 16.000000 | 5.2815560 | 5.1700051 | 0.1115509 | 2.1120845 | 5.0914063 | 5.2486039 | 4.2448874 | 6.0951228 | 1 |
| 103 | 16.000000 | 5.2600714 | 5.1700051 | 0.0900663 | 1.7122636 | 5.0914063 | 5.2486039 | 4.2448874 | 6.0951228 | 1 |
| 104 | 17.000000 | 4.6323763 | 5.1382663 | -0.505890 | -10.92074 | 5.0590723 | 5.2174603 | 4.2130978 | 6.0634348 | 1 |
| 105 | 18.000000 | 5.2236556 | 5.1046197 | 0.1190359 | 2.2787849 | 5.0245749 | 5.1846645 | 4.1793780 | 6.0298614 | 1 |
| 106 | 18.000000 | 5.1760913 | 5.1046197 | 0.0714716 | 1.3808021 | 5.0245749 | 5.1846645 | 4.1793780 | 6.0298614 | 1 |
| 107 | 18.000000 | 5.0128372 | 5.1046197 | -0.091782 | -1.830948 | 5.0245749 | 5.1846645 | 4.1793780 | 6.0298614 | 1 |
| 108 | 18.000000 | 5.1461280 | 5.1046197 | 0.0415084 | 0.8065938 | 5.0245749 | 5.1846645 | 4.1793780 | 6.0298614 | 1 |
| 109 | 18.000000 | 4.6532125 | 5.1046197 | -0.451407 | -9.700979 | 5.0245749 | 5.1846645 | 4.1793780 | 6.0298614 | 1 |
| 110 | 19.000000 | 5.0000000 | 5.0690101 | -0.069010 | -1.380202 | 4.9879341 | 5.1500861 | 4.1436786 | 5.9943416 | 1 |
| 111 | 19.000000 | 5.2087664 | 5.0690101 | 0.1397563 | 2.6830980 | 4.9879341 | 5.1500861 | 4.1436786 | 5.9943416 | 1 |
| 112 | 19.000000 | 5.0530784 | 5.0690101 | -0.015932 | -0.315286 | 4.9879341 | 5.1500861 | 4.1436786 | 5.9943416 | 1 |
| 113 | 20.000000 | 4.2552725 | 5.0313859 | -0.776113 | -18.23886 | 4.9491772 | 5.1135946 | 4.1059545 | 5.9568173 | 1 |
| 114 | 20.000000 | 4.3222193 | 5.0313859 | -0.709167 | -16.40746 | 4.9491772 | 5.1135946 | 4.1059545 | 5.9568173 | 1 |
| 115 | 20.000000 | 5.1847510 | 5.0313859 | 0.1533651 | 2.9580039 | 4.9491772 | 5.1135946 | 4.1059545 | 5.9568173 | 1 |
| 116 | 20.000000 | 4.9258121 | 5.0313859 | -0.105574 | -2.143277 | 4.9491772 | 5.1135946 | 4.1059545 | 5.9568173 | 1 |
| 117 | 20.000000 | 4.3979400 | 5.0313859 | -0.633446 | -14.40324 | 4.9491772 | 5.1135946 | 4.1059545 | 5.9568173 | 1 |
| 118 | 20.000000 | 4.4471580 | 5.0313859 | -0.584228 | -13.13711 | 4.9491772 | 5.1135946 | 4.1059545 | 5.9568173 | 1 |
| 119 | 21.000000 | 5.4834011 | 4.9916994 | 0.4917018 | 8.9670943 | 4.9083357 | 5.0750631 | 4.0661647 | 5.9172341 | 1 |
| 120 | 21.000000 | 4.9267102 | 4.9916994 | -0.064989 | -1.319119 | 4.9083357 | 5.0750631 | 4.0661647 | 5.9172341 | 1 |
| 121 | 21.000000 | 5.1605616 | 4.9916994 | 0.1688622 | 3.2721668 | 4.9083357 | 5.0750631 | 4.0661647 | 5.9172341 | 1 |
| 122 | 22.000000 | 5.1366381 | 4.9499073 | 0.1867308 | 3.6352727 | 4.8654428 | 5.0343718 | 4.0242728 | 5.8755419 | 1 |
| 123 | 22.000000 | 5.3652539 | 4.9499073 | 0.4153466 | 7.7414154 | 4.8654428 | 5.0343718 | 4.0242728 | 5.8755419 | 1 |
| 124 | 23.000000 | 5.0086002 | 4.9059715 | 0.1026287 | 2.0490498 | 4.8205322 | 4.9914107 | 3.9802475 | 5.8316954 | 1 |

|     |           |           |           |           |           |           |           |           |           |   |
|-----|-----------|-----------|-----------|-----------|-----------|-----------|-----------|-----------|-----------|---|
| 125 | 23.000000 | 5.0170333 | 4.9059715 | 0.1110619 | 2.2136963 | 4.8205322 | 4.9914107 | 3.9802475 | 5.8316954 | 1 |
| 126 | 24.000000 | 4.8573325 | 4.8598588 | -0.002526 | -0.052011 | 4.7736363 | 4.9460813 | 3.9340622 | 5.7856554 | 1 |
| 127 | 24.000000 | 4.7402521 | 4.8598588 | -0.119607 | -2.523214 | 4.7736363 | 4.9460813 | 3.9340622 | 5.7856554 | 1 |
| 128 | 24.000000 | 5.2686996 | 4.8598588 | 0.4088408 | 7.7598049 | 4.7736363 | 4.9460813 | 3.9340622 | 5.7856554 | 1 |
| 129 | 24.000000 | 4.8260748 | 4.8598588 | -0.033784 | -0.700031 | 4.7736363 | 4.9460813 | 3.9340622 | 5.7856554 | 1 |
| 130 | 25.000000 | 4.8500000 | 4.8115423 | 0.0384577 | 0.7929423 | 4.7247858 | 4.8982988 | 3.8856958 | 5.7373888 | 1 |
| 131 | 25.000000 | 4.4471580 | 4.8115423 | -0.364384 | -8.193643 | 4.7247858 | 4.8982988 | 3.8856958 | 5.7373888 | 1 |
| 132 | 25.000000 | 4.4149733 | 4.8115423 | -0.396569 | -8.982363 | 4.7247858 | 4.8982988 | 3.8856958 | 5.7373888 | 1 |
| 133 | 25.000000 | 4.6232493 | 4.8115423 | -0.188293 | -4.072742 | 4.7247858 | 4.8982988 | 3.8856958 | 5.7373888 | 1 |
| 134 | 25.000000 | 4.9359454 | 4.8115423 | 0.1244031 | 2.5203494 | 4.7247858 | 4.8982988 | 3.8856958 | 5.7373888 | 1 |
| 135 | 25.000000 | 4.5314789 | 4.8115423 | -0.280063 | -6.180397 | 4.7247858 | 4.8982988 | 3.8856958 | 5.7373888 | 1 |
| 136 | 25.000000 | 4.7500000 | 4.8115423 | -0.061542 | -1.295627 | 4.7247858 | 4.8982988 | 3.8856958 | 5.7373888 | 1 |
| 137 | 25.000000 | 4.9000000 | 4.8115423 | 0.0884577 | 1.8052592 | 4.7247858 | 4.8982988 | 3.8856958 | 5.7373888 | 1 |
| 138 | 26.000000 | 5.0718820 | 4.7610010 | 0.3108810 | 6.1294999 | 4.6740090 | 4.8479930 | 3.8351324 | 5.6868696 | 1 |
| 139 | 26.000000 | 5.0413927 | 4.7610010 | 0.2803917 | 5.5617902 | 4.6740090 | 4.8479930 | 3.8351324 | 5.6868696 | 1 |
| 140 | 26.000000 | 5.0465576 | 4.7610010 | 0.2855566 | 5.6584431 | 4.6740090 | 4.8479930 | 3.8351324 | 5.6868696 | 1 |
| 141 | 26.000000 | 5.2375287 | 4.7610010 | 0.4765277 | 9.0983303 | 4.6740090 | 4.8479930 | 3.8351324 | 5.6868696 | 1 |
| 142 | 26.000000 | 5.4000000 | 4.7610010 | 0.6389990 | 11.833315 | 4.6740090 | 4.8479930 | 3.8351324 | 5.6868696 | 1 |
| 143 | 27.000000 | 4.8000000 | 4.7082207 | 0.0917793 | 1.9120694 | 4.6213309 | 4.7951104 | 3.7823617 | 5.6340797 | 1 |
| 144 | 27.000000 | 4.4471580 | 4.7082207 | -0.261063 | -5.870325 | 4.6213309 | 4.7951104 | 3.7823617 | 5.6340797 | 1 |
| 145 | 27.000000 | 4.5051500 | 4.7082207 | -0.203071 | -4.507523 | 4.6213309 | 4.7951104 | 3.7823617 | 5.6340797 | 1 |
| 146 | 27.000000 | 4.2296946 | 4.7082207 | -0.478526 | -11.31349 | 4.6213309 | 4.7951104 | 3.7823617 | 5.6340797 | 1 |
| 147 | 28.000000 | 4.1139434 | 4.6531940 | -0.539251 | -13.10788 | 4.5667728 | 4.7396153 | 3.7273789 | 5.5790092 | 1 |
| 148 | 28.000000 | 4.4000000 | 4.6531940 | -0.253194 | -5.754410 | 4.5667728 | 4.7396153 | 3.7273789 | 5.5790092 | 1 |
| 149 | 28.000000 | 4.8000000 | 4.6531940 | 0.1468060 | 3.0584574 | 4.5667728 | 4.7396153 | 3.7273789 | 5.5790092 | 1 |
| 150 | 28.000000 | 4.3424227 | 4.6531940 | -0.310771 | -7.156636 | 4.5667728 | 4.7396153 | 3.7273789 | 5.5790092 | 1 |
| 151 | 28.000000 | 5.5586978 | 4.6531940 | 0.9055037 | 16.289854 | 4.5667728 | 4.7396153 | 3.7273789 | 5.5790092 | 1 |
| 152 | 28.000000 | 4.0413927 | 4.6531940 | -0.611801 | -15.13838 | 4.5667728 | 4.7396153 | 3.7273789 | 5.5790092 | 1 |
| 153 | 28.000000 | 4.5797836 | 4.6531940 | -0.073410 | -1.602924 | 4.5667728 | 4.7396153 | 3.7273789 | 5.5790092 | 1 |
| 154 | 29.000000 | 4.0791812 | 4.5959212 | -0.516740 | -12.66774 | 4.5103511 | 4.6814913 | 3.6701851 | 5.5216573 | 1 |
| 155 | 29.000000 | 4.4500000 | 4.5959212 | -0.145921 | -3.279128 | 4.5103511 | 4.6814913 | 3.6701851 | 5.5216573 | 1 |
| 156 | 29.000000 | 4.1461280 | 4.5959212 | -0.449793 | -10.84851 | 4.5103511 | 4.6814913 | 3.6701851 | 5.5216573 | 1 |
| 157 | 29.000000 | 5.0516811 | 4.5959212 | 0.4557599 | 9.0219445 | 4.5103511 | 4.6814913 | 3.6701851 | 5.5216573 | 1 |
| 158 | 30.000000 | 5.0684901 | 4.5364099 | 0.5320802 | 10.497805 | 4.4520756 | 4.6207442 | 3.6107873 | 5.4620326 | 1 |
| 159 | 30.000000 | 4.4300000 | 4.5364099 | -0.106410 | -2.402030 | 4.4520756 | 4.6207442 | 3.6107873 | 5.4620326 | 1 |
| 160 | 30.000000 | 3.8808136 | 4.5364099 | -0.655596 | -16.89327 | 4.4520756 | 4.6207442 | 3.6107873 | 5.4620326 | 1 |
| 161 | 30.000000 | 4.6223177 | 4.5364099 | 0.0859078 | 1.8585428 | 4.4520756 | 4.6207442 | 3.6107873 | 5.4620326 | 1 |
| 162 | 30.000000 | 4.2552725 | 4.5364099 | -0.281137 | -6.606801 | 4.4520756 | 4.6207442 | 3.6107873 | 5.4620326 | 1 |
| 163 | 30.000000 | 3.6723288 | 4.5364099 | -0.864081 | -23.52951 | 4.4520756 | 4.6207442 | 3.6107873 | 5.4620326 | 1 |
| 164 | 31.000000 | 3.6901961 | 4.4746758 | -0.784480 | -21.25848 | 4.3919476 | 4.5574039 | 3.5491981 | 5.4001535 | 1 |
| 165 | 31.000000 | 4.3010300 | 4.4746758 | -0.173646 | -4.037307 | 4.3919476 | 4.5574039 | 3.5491981 | 5.4001535 | 1 |
| 166 | 31.000000 | 4.7084719 | 4.4746758 | 0.2337961 | 4.9654349 | 4.3919476 | 4.5574039 | 3.5491981 | 5.4001535 | 1 |

|     |           |           |           |           |           |           |           |           |           |   |
|-----|-----------|-----------|-----------|-----------|-----------|-----------|-----------|-----------|-----------|---|
| 167 | 31.000000 | 4.0000000 | 4.4746758 | -0.474676 | -11.86689 | 4.3919476 | 4.5574039 | 3.5491981 | 5.4001535 | 1 |
| 168 | 31.000000 | 4.8500000 | 4.4746758 | 0.3753242 | 7.7386436 | 4.3919476 | 4.5574039 | 3.5491981 | 5.4001535 | 1 |
| 169 | 31.000000 | 4.3424227 | 4.4746758 | -0.132253 | -3.045606 | 4.3919476 | 4.5574039 | 3.5491981 | 5.4001535 | 1 |
| 170 | 31.000000 | 4.3617278 | 4.4746758 | -0.112948 | -2.589523 | 4.3919476 | 4.5574039 | 3.5491981 | 5.4001535 | 1 |
| 171 | 31.000000 | 4.6500000 | 4.4746758 | 0.1753242 | 3.7704132 | 4.3919476 | 4.5574039 | 3.5491981 | 5.4001535 | 1 |
| 172 | 31.000000 | 3.5051500 | 4.4746758 | -0.969526 | -27.66004 | 4.3919476 | 4.5574039 | 3.5491981 | 5.4001535 | 1 |
| 173 | 31.000000 | 4.2552725 | 4.4746758 | -0.219403 | -5.156034 | 4.3919476 | 4.5574039 | 3.5491981 | 5.4001535 | 1 |
| 174 | 32.000000 | 4.9951985 | 4.4107426 | 0.5844559 | 11.700353 | 4.3299569 | 4.4915284 | 3.4854365 | 5.3360487 | 1 |
| 175 | 32.000000 | 4.5563025 | 4.4107426 | 0.1455599 | 3.1946929 | 4.3299569 | 4.4915284 | 3.4854365 | 5.3360487 | 1 |
| 176 | 32.000000 | 4.5119368 | 4.4107426 | 0.1011942 | 2.2428102 | 4.3299569 | 4.4915284 | 3.4854365 | 5.3360487 | 1 |
| 177 | 32.000000 | 4.1723110 | 4.4107426 | -0.238432 | -5.714619 | 4.3299569 | 4.4915284 | 3.4854365 | 5.3360487 | 1 |
| 178 | 32.000000 | 4.6020600 | 4.4107426 | 0.1913174 | 4.1572114 | 4.3299569 | 4.4915284 | 3.4854365 | 5.3360487 | 1 |
| 179 | 32.000000 | 4.9000000 | 4.4107426 | 0.4892574 | 9.9848443 | 4.3299569 | 4.4915284 | 3.4854365 | 5.3360487 | 1 |
| 180 | 32.000000 | 4.3222193 | 4.4107426 | -0.088523 | -2.048099 | 4.3299569 | 4.4915284 | 3.4854365 | 5.3360487 | 1 |
| 181 | 32.000000 | 4.3979400 | 4.4107426 | -0.012803 | -0.291105 | 4.3299569 | 4.4915284 | 3.4854365 | 5.3360487 | 1 |
| 182 | 32.000000 | 4.8260748 | 4.4107426 | 0.4153322 | 8.6060036 | 4.3299569 | 4.4915284 | 3.4854365 | 5.3360487 | 1 |
| 183 | 32.000000 | 4.7000000 | 4.4107426 | 0.2892574 | 6.1544121 | 4.3299569 | 4.4915284 | 3.4854365 | 5.3360487 | 1 |
| 184 | 32.000000 | 4.7708520 | 4.4107426 | 0.3601094 | 7.5481147 | 4.3299569 | 4.4915284 | 3.4854365 | 5.3360487 | 1 |
| 185 | 33.000000 | 4.1461280 | 4.3446425 | -0.198515 | -4.787949 | 4.2660776 | 4.4232075 | 3.4195277 | 5.2697574 | 1 |
| 186 | 33.000000 | 4.6686095 | 4.3446425 | 0.3239670 | 6.9392606 | 4.2660776 | 4.4232075 | 3.4195277 | 5.2697574 | 1 |
| 187 | 33.000000 | 5.6042455 | 4.3446425 | 1.2596030 | 22.475870 | 4.2660776 | 4.4232075 | 3.4195277 | 5.2697574 | 1 |
| 188 | 33.000000 | 4.0098756 | 4.3446425 | -0.334767 | -8.348561 | 4.2660776 | 4.4232075 | 3.4195277 | 5.2697574 | 1 |
| 189 | 33.000000 | 4.1760913 | 4.3446425 | -0.168551 | -4.036102 | 4.2660776 | 4.4232075 | 3.4195277 | 5.2697574 | 1 |
| 190 | 33.000000 | 4.0683158 | 4.3446425 | -0.276327 | -6.792167 | 4.2660776 | 4.4232075 | 3.4195277 | 5.2697574 | 1 |
| 191 | 33.000000 | 4.2584936 | 4.3446425 | -0.086149 | -2.022991 | 4.2660776 | 4.4232075 | 3.4195277 | 5.2697574 | 1 |
| 192 | 33.000000 | 4.1760913 | 4.3446425 | -0.168551 | -4.036102 | 4.2660776 | 4.4232075 | 3.4195277 | 5.2697574 | 1 |
| 193 | 33.000000 | 4.5000000 | 4.3446425 | 0.1553575 | 3.4523878 | 4.2660776 | 4.4232075 | 3.4195277 | 5.2697574 | 1 |
| 194 | 33.000000 | 4.1760913 | 4.3446425 | -0.168551 | -4.036102 | 4.2660776 | 4.4232075 | 3.4195277 | 5.2697574 | 1 |
| 195 | 34.000000 | 5.1276166 | 4.2764161 | 0.8512005 | 16.600315 | 4.2002636 | 4.3525686 | 3.3515030 | 5.2013292 | 1 |
| 196 | 34.000000 | 4.7500000 | 4.2764161 | 0.4735839 | 9.9701878 | 4.2002636 | 4.3525686 | 3.3515030 | 5.2013292 | 1 |
| 197 | 35.000000 | 4.5500000 | 4.2061123 | 0.3438877 | 7.5579719 | 4.1324423 | 4.2797823 | 3.2814003 | 5.1308243 | 1 |
| 198 | 35.000000 | 4.9500000 | 4.2061123 | 0.7438877 | 15.028035 | 4.1324423 | 4.2797823 | 3.2814003 | 5.1308243 | 1 |
| 199 | 35.000000 | 4.0127529 | 4.2061123 | -0.193359 | -4.818622 | 4.1324423 | 4.2797823 | 3.2814003 | 5.1308243 | 1 |
| 200 | 35.000000 | 4.0233965 | 4.2061123 | -0.182716 | -4.541331 | 4.1324423 | 4.2797823 | 3.2814003 | 5.1308243 | 1 |
| 201 | 36.000000 | 2.2380461 | 4.1337887 | -1.895743 | -84.70525 | 4.0625090 | 4.2050684 | 3.2092641 | 5.0583134 | 1 |
| 202 | 36.000000 | 4.4500000 | 4.1337887 | 0.3162113 | 7.1058713 | 4.0625090 | 4.2050684 | 3.2092641 | 5.0583134 | 1 |
| 203 | 36.000000 | 4.4900990 | 4.1337887 | 0.3563103 | 7.9354659 | 4.0625090 | 4.2050684 | 3.2092641 | 5.0583134 | 1 |
| 204 | 36.000000 | 4.2013015 | 4.1337887 | 0.0675128 | 1.6069493 | 4.0625090 | 4.2050684 | 3.2092641 | 5.0583134 | 1 |
| 205 | 36.000000 | 4.2500000 | 4.1337887 | 0.1162113 | 2.7343829 | 4.0625090 | 4.2050684 | 3.2092641 | 5.0583134 | 1 |
| 206 | 36.000000 | 3.7075702 | 4.1337887 | -0.426219 | -11.49590 | 4.0625090 | 4.2050684 | 3.2092641 | 5.0583134 | 1 |
| 207 | 36.000000 | 4.1267157 | 4.1337887 | -0.007073 | -0.171396 | 4.0625090 | 4.2050684 | 3.2092641 | 5.0583134 | 1 |
| 208 | 36.000000 | 4.6500000 | 4.1337887 | 0.5162113 | 11.101318 | 4.0625090 | 4.2050684 | 3.2092641 | 5.0583134 | 1 |



|     |           |           |           |           |           |           |           |           |           |   |
|-----|-----------|-----------|-----------|-----------|-----------|-----------|-----------|-----------|-----------|---|
| 209 | 36.000000 | 3.8300752 | 4.1337887 | -0.303714 | -7.929702 | 4.0625090 | 4.2050684 | 3.2092641 | 5.0583134 | 1 |
| 210 | 36.000000 | 3.9912261 | 4.1337887 | -0.142563 | -3.571901 | 4.0625090 | 4.2050684 | 3.2092641 | 5.0583134 | 1 |
| 211 | 37.000000 | 5.0863598 | 4.0595115 | 1.0268483 | 20.188275 | 3.9903233 | 4.1286997 | 3.1351458 | 4.9838772 | 1 |
| 212 | 37.000000 | 5.3000000 | 4.0595115 | 1.2404885 | 23.405443 | 3.9903233 | 4.1286997 | 3.1351458 | 4.9838772 | 1 |
| 213 | 37.000000 | 4.9344985 | 4.0595115 | 0.8749870 | 17.732034 | 3.9903233 | 4.1286997 | 3.1351458 | 4.9838772 | 1 |
| 214 | 37.000000 | 4.4175215 | 4.0595115 | 0.3580100 | 8.1043185 | 3.9903233 | 4.1286997 | 3.1351458 | 4.9838772 | 1 |
| 215 | 37.000000 | 4.4968743 | 4.0595115 | 0.4373628 | 9.7259294 | 3.9903233 | 4.1286997 | 3.1351458 | 4.9838772 | 1 |
| 216 | 37.000000 | 3.9340184 | 4.0595115 | -0.125493 | -3.189946 | 3.9903233 | 4.1286997 | 3.1351458 | 4.9838772 | 1 |
| 217 | 38.000000 | 4.6558776 | 3.9833551 | 0.6725226 | 14.444593 | 3.9157116 | 4.0509985 | 3.0591036 | 4.9076065 | 1 |
| 218 | 38.000000 | 4.5440680 | 3.9833551 | 0.5607130 | 12.339450 | 3.9157116 | 4.0509985 | 3.0591036 | 4.9076065 | 1 |
| 219 | 38.000000 | 4.0103848 | 3.9833551 | 0.0270297 | 0.6739931 | 3.9157116 | 4.0509985 | 3.0591036 | 4.9076065 | 1 |
| 220 | 38.000000 | 3.3859636 | 3.9833551 | -0.597391 | -17.64318 | 3.9157116 | 4.0509985 | 3.0591036 | 4.9076065 | 1 |
| 221 | 38.000000 | 4.7500000 | 3.9833551 | 0.7666449 | 16.139894 | 3.9157116 | 4.0509985 | 3.0591036 | 4.9076065 | 1 |
| 222 | 38.000000 | 4.4591210 | 3.9833551 | 0.4757659 | 10.669500 | 3.9157116 | 4.0509985 | 3.0591036 | 4.9076065 | 1 |
| 223 | 38.000000 | 4.3802112 | 3.9833551 | 0.3968562 | 9.0602065 | 3.9157116 | 4.0509985 | 3.0591036 | 4.9076065 | 1 |
| 224 | 38.000000 | 2.5751878 | 3.9833551 | -1.408167 | -54.68212 | 3.9157116 | 4.0509985 | 3.0591036 | 4.9076065 | 1 |
| 225 | 38.000000 | 4.7000000 | 3.9833551 | 0.7166449 | 15.247765 | 3.9157116 | 4.0509985 | 3.0591036 | 4.9076065 | 1 |
| 226 | 39.000000 | 3.0246909 | 3.9054021 | -0.880711 | -29.11740 | 3.8384820 | 3.9723221 | 2.9812033 | 4.8296008 | 1 |
| 227 | 39.000000 | 4.1630122 | 3.9054021 | 0.2576101 | 6.1880703 | 3.8384820 | 3.9723221 | 2.9812033 | 4.8296008 | 1 |
| 228 | 39.000000 | 3.8160092 | 3.9054021 | -0.089393 | -2.342576 | 3.8384820 | 3.9723221 | 2.9812033 | 4.8296008 | 1 |
| 229 | 39.000000 | 4.0917724 | 3.9054021 | 0.1863704 | 4.5547585 | 3.8384820 | 3.9723221 | 2.9812033 | 4.8296008 | 1 |
| 230 | 39.000000 | 4.6500000 | 3.9054021 | 0.7445979 | 16.012858 | 3.8384820 | 3.9723221 | 2.9812033 | 4.8296008 | 1 |
| 231 | 39.000000 | 4.0606978 | 3.9054021 | 0.1552958 | 3.8243612 | 3.8384820 | 3.9723221 | 2.9812033 | 4.8296008 | 1 |
| 232 | 39.000000 | 4.7000000 | 3.9054021 | 0.7945979 | 16.906339 | 3.8384820 | 3.9723221 | 2.9812033 | 4.8296008 | 1 |
| 233 | 39.000000 | 4.3002693 | 3.9054021 | 0.3948672 | 9.1823836 | 3.8384820 | 3.9723221 | 2.9812033 | 4.8296008 | 1 |
| 234 | 39.000000 | 3.6070259 | 3.9054021 | -0.298376 | -8.272084 | 3.8384820 | 3.9723221 | 2.9812033 | 4.8296008 | 1 |
| 235 | 39.000000 | 4.2628069 | 3.9054021 | 0.3574048 | 8.3842604 | 3.8384820 | 3.9723221 | 2.9812033 | 4.8296008 | 1 |
| 236 | 40.000000 | 3.4087486 | 3.8257433 | -0.416995 | -12.23307 | 3.7584554 | 3.8930312 | 2.9015178 | 4.7499688 | 1 |
| 237 | 40.000000 | 3.5563025 | 3.8257433 | -0.269441 | -7.576431 | 3.7584554 | 3.8930312 | 2.9015178 | 4.7499688 | 1 |
| 238 | 40.000000 | 4.0413927 | 3.8257433 | 0.2156494 | 5.3360165 | 3.7584554 | 3.8930312 | 2.9015178 | 4.7499688 | 1 |
| 239 | 40.000000 | 3.9000000 | 3.8257433 | 0.0742567 | 1.9040178 | 3.7584554 | 3.8930312 | 2.9015178 | 4.7499688 | 1 |
| 240 | 40.000000 | 3.4913617 | 3.8257433 | -0.334382 | -9.577398 | 3.7584554 | 3.8930312 | 2.9015178 | 4.7499688 | 1 |
| 241 | 40.000000 | 4.2304489 | 3.8257433 | 0.4047056 | 9.5664934 | 3.7584554 | 3.8930312 | 2.9015178 | 4.7499688 | 1 |
| 242 | 40.000000 | 4.5000000 | 3.8257433 | 0.6742567 | 14.983482 | 3.7584554 | 3.8930312 | 2.9015178 | 4.7499688 | 1 |
| 243 | 41.000000 | 2.9196010 | 3.7444772 | -0.824876 | -28.25304 | 3.6755084 | 3.8134459 | 2.8201278 | 4.6688265 | 1 |
| 244 | 41.000000 | 3.1500000 | 3.7444772 | -0.594477 | -18.87229 | 3.6755084 | 3.8134459 | 2.8201278 | 4.6688265 | 1 |
| 245 | 41.000000 | 2.6532125 | 3.7444772 | -1.091265 | -41.12994 | 3.6755084 | 3.8134459 | 2.8201278 | 4.6688265 | 1 |
| 246 | 41.000000 | 2.8325089 | 3.7444772 | -0.911968 | -32.19648 | 3.6755084 | 3.8134459 | 2.8201278 | 4.6688265 | 1 |
| 247 | 41.000000 | 3.2595939 | 3.7444772 | -0.484883 | -14.87557 | 3.6755084 | 3.8134459 | 2.8201278 | 4.6688265 | 1 |
| 248 | 41.000000 | 3.3698650 | 3.7444772 | -0.374612 | -11.11653 | 3.6755084 | 3.8134459 | 2.8201278 | 4.6688265 | 1 |
| 249 | 42.000000 | 3.4891144 | 3.6617095 | -0.172595 | -4.946674 | 3.5896150 | 3.7338039 | 2.7371217 | 4.5862973 | 1 |
| 250 | 42.000000 | 3.5051500 | 3.6617095 | -0.156559 | -4.466556 | 3.5896150 | 3.7338039 | 2.7371217 | 4.5862973 | 1 |

|     |           |           |           |           |           |           |           |           |           |   |
|-----|-----------|-----------|-----------|-----------|-----------|-----------|-----------|-----------|-----------|---|
| 251 | 42.000000 | 2.4771213 | 3.6617095 | -1.184588 | -47.82116 | 3.5896150 | 3.7338039 | 2.7371217 | 4.5862973 | 1 |
| 252 | 42.000000 | 2.9410142 | 3.6617095 | -0.720695 | -24.50499 | 3.5896150 | 3.7338039 | 2.7371217 | 4.5862973 | 1 |
| 253 | 42.000000 | 3.2304489 | 3.6617095 | -0.431261 | -13.34986 | 3.5896150 | 3.7338039 | 2.7371217 | 4.5862973 | 1 |
| 254 | 42.000000 | 2.8873359 | 3.6617095 | -0.774374 | -26.81966 | 3.5896150 | 3.7338039 | 2.7371217 | 4.5862973 | 1 |
| 255 | 42.000000 | 3.7000000 | 3.6617095 | 0.0382905 | 1.0348791 | 3.5896150 | 3.7338039 | 2.7371217 | 4.5862973 | 1 |
| 256 | 42.000000 | 3.7500000 | 3.6617095 | 0.0882905 | 2.3544141 | 3.5896150 | 3.7338039 | 2.7371217 | 4.5862973 | 1 |
| 257 | 42.000000 | 3.7529699 | 3.6617095 | 0.0912604 | 2.4316847 | 3.5896150 | 3.7338039 | 2.7371217 | 4.5862973 | 1 |
| 258 | 42.000000 | 3.9458623 | 3.6617095 | 0.2841529 | 7.2012865 | 3.5896150 | 3.7338039 | 2.7371217 | 4.5862973 | 1 |
| 259 | 42.000000 | 4.4067275 | 3.6617095 | 0.7450180 | 16.906378 | 3.5896150 | 3.7338039 | 2.7371217 | 4.5862973 | 1 |
| 260 | 43.000000 | 3.8000000 | 3.5775531 | 0.2224469 | 5.8538650 | 3.5008652 | 3.6542411 | 2.6525958 | 4.5025105 | 1 |
| 261 | 43.000000 | 4.0883488 | 3.5775531 | 0.5107956 | 12.493935 | 3.5008652 | 3.6542411 | 2.6525958 | 4.5025105 | 1 |
| 262 | 43.000000 | 3.7323938 | 3.5775531 | 0.1548406 | 4.1485609 | 3.5008652 | 3.6542411 | 2.6525958 | 4.5025105 | 1 |
| 263 | 43.000000 | 3.2952371 | 3.5775531 | -0.282316 | -8.567396 | 3.5008652 | 3.6542411 | 2.6525958 | 4.5025105 | 1 |
| 264 | 43.000000 | 2.4771213 | 3.5775531 | -1.100432 | -44.42382 | 3.5008652 | 3.6542411 | 2.6525958 | 4.5025105 | 1 |
| 265 | 43.000000 | 3.0877814 | 3.5775531 | -0.489772 | -15.86161 | 3.5008652 | 3.6542411 | 2.6525958 | 4.5025105 | 1 |
| 266 | 43.000000 | 4.1500000 | 3.5775531 | 0.5724469 | 13.793900 | 3.5008652 | 3.6542411 | 2.6525958 | 4.5025105 | 1 |
| 267 | 43.000000 | 3.2787536 | 3.5775531 | -0.298800 | -9.113205 | 3.5008652 | 3.6542411 | 2.6525958 | 4.5025105 | 1 |
| 268 | 43.000000 | 4.4500000 | 3.5775531 | 0.8724469 | 19.605548 | 3.5008652 | 3.6542411 | 2.6525958 | 4.5025105 | 1 |
| 269 | 43.000000 | 3.2648178 | 3.5775531 | -0.312735 | -9.578951 | 3.5008652 | 3.6542411 | 2.6525958 | 4.5025105 | 1 |
| 270 | 43.000000 | 3.5215957 | 3.5775531 | -0.055957 | -1.588980 | 3.5008652 | 3.6542411 | 2.6525958 | 4.5025105 | 1 |
| 271 | 43.000000 | 3.7160033 | 3.5775531 | 0.1384502 | 3.7257828 | 3.5008652 | 3.6542411 | 2.6525958 | 4.5025105 | 1 |
| 272 | 43.000000 | 3.6127839 | 3.5775531 | 0.0352307 | 0.9751684 | 3.5008652 | 3.6542411 | 2.6525958 | 4.5025105 | 1 |
| 273 | 44.000000 | 3.6948683 | 3.4921275 | 0.2027408 | 5.4870908 | 3.4094536 | 3.5748015 | 2.5666547 | 4.4176004 | 1 |
| 274 | 44.000000 | 3.3856063 | 3.4921275 | -0.106521 | -3.146298 | 3.4094536 | 3.5748015 | 2.5666547 | 4.4176004 | 1 |
| 275 | 44.000000 | 4.3576300 | 3.4921275 | 0.8655024 | 19.861770 | 3.4094536 | 3.5748015 | 2.5666547 | 4.4176004 | 1 |
| 276 | 44.000000 | 3.1518293 | 3.4921275 | -0.340298 | -10.79685 | 3.4094536 | 3.5748015 | 2.5666547 | 4.4176004 | 1 |
| 277 | 44.000000 | 3.1000000 | 3.4921275 | -0.392128 | -12.64928 | 3.4094536 | 3.5748015 | 2.5666547 | 4.4176004 | 1 |
| 278 | 44.000000 | 4.3000000 | 3.4921275 | 0.8078725 | 18.787731 | 3.4094536 | 3.5748015 | 2.5666547 | 4.4176004 | 1 |
| 279 | 44.000000 | 4.6500000 | 3.4921275 | 1.1578725 | 24.900483 | 3.4094536 | 3.5748015 | 2.5666547 | 4.4176004 | 1 |
| 280 | 44.000000 | 2.4913617 | 3.4921275 | -1.000766 | -40.16943 | 3.4094536 | 3.5748015 | 2.5666547 | 4.4176004 | 1 |
| 281 | 44.000000 | 3.8549737 | 3.4921275 | 0.3628461 | 9.4124151 | 3.4094536 | 3.5748015 | 2.5666547 | 4.4176004 | 1 |
| 282 | 44.000000 | 3.9460099 | 3.4921275 | 0.4538823 | 11.502311 | 3.4094536 | 3.5748015 | 2.5666547 | 4.4176004 | 1 |
| 283 | 44.000000 | 3.4827307 | 3.4921275 | -0.009397 | -0.269813 | 3.4094536 | 3.5748015 | 2.5666547 | 4.4176004 | 1 |
| 284 | 44.000000 | 4.2000000 | 3.4921275 | 0.7078725 | 16.854106 | 3.4094536 | 3.5748015 | 2.5666547 | 4.4176004 | 1 |
| 285 | 44.000000 | 3.2500000 | 3.4921275 | -0.242128 | -7.450078 | 3.4094536 | 3.5748015 | 2.5666547 | 4.4176004 | 1 |
| 286 | 44.000000 | 1.6020600 | 3.4921275 | -1.890068 | -117.9773 | 3.4094536 | 3.5748015 | 2.5666547 | 4.4176004 | 1 |
| 287 | 45.000000 | 3.6989700 | 3.4055582 | 0.2934118 | 7.9322565 | 3.3156479 | 3.4954686 | 2.4794109 | 4.3317056 | 1 |
| 288 | 45.000000 | 4.4801507 | 3.4055582 | 1.0745925 | 23.985633 | 3.3156479 | 3.4954686 | 2.4794109 | 4.3317056 | 1 |
| 289 | 45.000000 | 2.6565773 | 3.4055582 | -0.748981 | -28.19346 | 3.3156479 | 3.4954686 | 2.4794109 | 4.3317056 | 1 |
| 290 | 45.000000 | 2.8305887 | 3.4055582 | -0.574970 | -20.31272 | 3.3156479 | 3.4954686 | 2.4794109 | 4.3317056 | 1 |
| 291 | 45.000000 | 3.0172421 | 3.4055582 | -0.388316 | -12.86990 | 3.3156479 | 3.4954686 | 2.4794109 | 4.3317056 | 1 |
| 292 | 45.000000 | 3.0860037 | 3.4055582 | -0.319555 | -10.35496 | 3.3156479 | 3.4954686 | 2.4794109 | 4.3317056 | 1 |

|     |           |           |           |            |           |           |           |           |           |   |
|-----|-----------|-----------|-----------|------------|-----------|-----------|-----------|-----------|-----------|---|
| 293 | 45.000000 | 4.2898453 | 3.4055582 | 0.8842870  | 20.613495 | 3.3156479 | 3.4954686 | 2.4794109 | 4.3317056 | 1 |
| 294 | 45.000000 | 3.8500000 | 3.4055582 | 0.4444418  | 11.543942 | 3.3156479 | 3.4954686 | 2.4794109 | 4.3317056 | 1 |
| 295 | 45.000000 | 3.5483894 | 3.4055582 | 0.1428312  | 4.0252404 | 3.3156479 | 3.4954686 | 2.4794109 | 4.3317056 | 1 |
| 296 | 45.000000 | 3.5185139 | 3.4055582 | 0.1129557  | 3.2103248 | 3.3156479 | 3.4954686 | 2.4794109 | 4.3317056 | 1 |
| 297 | 45.000000 | 3.5962671 | 3.4055582 | 0.1907089  | 5.3029685 | 3.3156479 | 3.4954686 | 2.4794109 | 4.3317056 | 1 |
| 298 | 45.000000 | 3.3500000 | 3.4055582 | -0.0555558 | -1.658454 | 3.3156479 | 3.4954686 | 2.4794109 | 4.3317056 | 1 |
| 299 | 45.000000 | 4.2000000 | 3.4055582 | 0.7944418  | 18.915281 | 3.3156479 | 3.4954686 | 2.4794109 | 4.3317056 | 1 |
| 300 | 45.000000 | 4.2000000 | 3.4055582 | 0.7944418  | 18.915281 | 3.3156479 | 3.4954686 | 2.4794109 | 4.3317056 | 1 |
| 301 | 45.000000 | 2.0472749 | 3.4055582 | -1.358283  | -66.34592 | 3.3156479 | 3.4954686 | 2.4794109 | 4.3317056 | 1 |
| 302 | 45.000000 | 3.5000000 | 3.4055582 | 0.0944418  | 2.6983367 | 3.3156479 | 3.4954686 | 2.4794109 | 4.3317056 | 1 |
| 303 | 45.000000 | 3.2500000 | 3.4055582 | -0.1555558 | -4.786407 | 3.3156479 | 3.4954686 | 2.4794109 | 4.3317056 | 1 |
| 304 | 45.000000 | 3.8000000 | 3.4055582 | 0.3944418  | 10.380047 | 3.3156479 | 3.4954686 | 2.4794109 | 4.3317056 | 1 |
| 305 | 45.000000 | 3.6289506 | 3.4055582 | 0.2233924  | 6.1558396 | 3.3156479 | 3.4954686 | 2.4794109 | 4.3317056 | 1 |
| 306 | 45.000000 | 2.4771213 | 3.4055582 | -0.928437  | -37.48048 | 3.3156479 | 3.4954686 | 2.4794109 | 4.3317056 | 1 |
| 307 | 45.000000 | 3.2652896 | 3.4055582 | -0.140269  | -4.295747 | 3.3156479 | 3.4954686 | 2.4794109 | 4.3317056 | 1 |
| 308 | 45.000000 | 3.6188323 | 3.4055582 | 0.2132740  | 5.8934493 | 3.3156479 | 3.4954686 | 2.4794109 | 4.3317056 | 1 |
| 309 | 46.000000 | 4.1000000 | 3.3179761 | 0.7820239  | 19.073753 | 3.2197536 | 3.4161987 | 2.3909849 | 4.2449674 | 1 |
| 310 | 46.000000 | 2.6937269 | 3.3179761 | -0.624249  | -23.17418 | 3.2197536 | 3.4161987 | 2.3909849 | 4.2449674 | 1 |
| 311 | 46.000000 | 3.9000000 | 3.3179761 | 0.5820239  | 14.923689 | 3.2197536 | 3.4161987 | 2.3909849 | 4.2449674 | 1 |
| 312 | 46.000000 | 3.9000000 | 3.3179761 | 0.5820239  | 14.923689 | 3.2197536 | 3.4161987 | 2.3909849 | 4.2449674 | 1 |
| 313 | 46.000000 | 2.4771213 | 3.3179761 | -0.840855  | -33.94484 | 3.2197536 | 3.4161987 | 2.3909849 | 4.2449674 | 1 |
| 314 | 46.000000 | 2.8450980 | 3.3179761 | -0.472878  | -16.62080 | 3.2197536 | 3.4161987 | 2.3909849 | 4.2449674 | 1 |
| 315 | 46.000000 | 3.1760913 | 3.3179761 | -0.141885  | -4.467280 | 3.2197536 | 3.4161987 | 2.3909849 | 4.2449674 | 1 |
| 316 | 46.000000 | 4.1500000 | 3.3179761 | 0.8320239  | 20.048768 | 3.2197536 | 3.4161987 | 2.3909849 | 4.2449674 | 1 |
| 317 | 46.000000 | 3.0791812 | 3.3179761 | -0.238795  | -7.755143 | 3.2197536 | 3.4161987 | 2.3909849 | 4.2449674 | 1 |
| 318 | 46.000000 | 3.1075491 | 3.3179761 | -0.210427  | -6.771478 | 3.2197536 | 3.4161987 | 2.3909849 | 4.2449674 | 1 |
| 319 | 46.000000 | 3.5035864 | 3.3179761 | 0.1856103  | 5.2977223 | 3.2197536 | 3.4161987 | 2.3909849 | 4.2449674 | 1 |
| 320 | 46.000000 | 3.7500000 | 3.3179761 | 0.4320239  | 11.520636 | 3.2197536 | 3.4161987 | 2.3909849 | 4.2449674 | 1 |
| 321 | 46.000000 | 3.8000000 | 3.3179761 | 0.4820239  | 12.684838 | 3.2197536 | 3.4161987 | 2.3909849 | 4.2449674 | 1 |
| 322 | 47.000000 | 3.8880671 | 3.2295173 | 0.6585498  | 16.937718 | 3.1220880 | 3.3369466 | 2.3015054 | 4.1575292 | 1 |
| 323 | 47.000000 | 2.6020600 | 3.2295173 | -0.627457  | -24.11387 | 3.1220880 | 3.3369466 | 2.3015054 | 4.1575292 | 1 |
| 324 | 47.000000 | 3.8450980 | 3.2295173 | 0.6155808  | 16.009495 | 3.1220880 | 3.3369466 | 2.3015054 | 4.1575292 | 1 |
| 325 | 47.000000 | 3.0827854 | 3.2295173 | -0.146732  | -4.759718 | 3.1220880 | 3.3369466 | 2.3015054 | 4.1575292 | 1 |
| 326 | 48.000000 | 3.0224284 | 3.1403219 | -0.117893  | -3.900621 | 3.0229647 | 3.2576790 | 2.2111084 | 4.0695354 | 1 |
| 327 | 48.000000 | 3.4424798 | 3.1403219 | 0.3021579  | 8.7773331 | 3.0229647 | 3.2576790 | 2.2111084 | 4.0695354 | 1 |
| 328 | 48.000000 | 2.5340261 | 3.1403219 | -0.606296  | -23.92618 | 3.0229647 | 3.2576790 | 2.2111084 | 4.0695354 | 1 |
| 329 | 49.000000 | 2.2479733 | 3.0505338 | -0.802560  | -35.70151 | 2.9226875 | 3.1783800 | 2.1199373 | 3.9811302 | 1 |
| 330 | 49.000000 | 2.9698816 | 3.0505338 | -0.080652  | -2.715667 | 2.9226875 | 3.1783800 | 2.1199373 | 3.9811302 | 1 |
| 331 | 49.000000 | 2.5440680 | 3.0505338 | -0.506466  | -19.90771 | 2.9226875 | 3.1783800 | 2.1199373 | 3.9811302 | 1 |
| 332 | 50.000000 | 3.0364293 | 2.9602998 | 0.0761295  | 2.5072038 | 2.8215480 | 3.0990516 | 2.0281426 | 3.8924570 | 1 |
| 333 | 50.000000 | 2.9247960 | 2.9602998 | -0.035504  | -1.213890 | 2.8215480 | 3.0990516 | 2.0281426 | 3.8924570 | 1 |
| 334 | 51.000000 | 2.2108534 | 2.8697690 | -0.658916  | -29.80368 | 2.7198269 | 3.0197111 | 1.9358806 | 3.8036575 | 1 |

|     |           |           |           |           |           |           |           |           |           |   |
|-----|-----------|-----------|-----------|-----------|-----------|-----------|-----------|-----------|-----------|---|
| 335 | 51.000000 | 3.2552725 | 2.8697690 | 0.3855035 | 11.842434 | 2.7198269 | 3.0197111 | 1.9358806 | 3.8036575 | 1 |
| 336 | 51.000000 | 2.6848454 | 2.8697690 | -0.184924 | -6.887684 | 2.7198269 | 3.0197111 | 1.9358806 | 3.8036575 | 1 |

Rank 1 Eqn 8058 ADC\_(a,b,c,d,e)

| Precision | Error @Xmin  | Error @Xmean | Error @Xmax  |
|-----------|--------------|--------------|--------------|
| 18        | 1.199786e-15 | 5.476343e-19 | 0.0000000000 |
| 17        | -5.68989e-15 | -1.29607e-17 | -1.23919e-17 |
| 16        | 6.334407e-14 | -1.00491e-16 | -6.91376e-17 |
| 15        | 3.596879e-13 | -7.77641e-17 | -2.51842e-16 |
| 14        | 3.517949e-13 | -2.38677e-15 | -5.01493e-16 |
| 13        | -1.37969e-10 | 2.537053e-14 | 1.097163e-13 |
| 12        | -9.28381e-10 | -3.07716e-13 | -1.19841e-13 |
| 11        | -7.82778e-09 | 1.065801e-11 | 2.115554e-11 |
| 10        | -6.69835e-08 | 1.180588e-10 | 2.007756e-10 |
| 9         | 3.275691e-07 | 5.812223e-10 | 1.179352e-09 |
| 8         | 3.214315e-07 | -4.94134e-09 | -7.43234e-09 |
| 7         | 3.283909e-07 | 9.003848e-08 | 6.695328e-08 |
| 6         | 0.0001977365 | 3.009804e-08 | -8.1815e-07  |
| 5         | -0.004744533 | 1.190841e-06 | 1.889804e-05 |
| 4         | 0.0554136915 | -3.47409e-06 | -8.88319e-05 |
| 3         | 1.1871345333 | -0.001232687 | -0.001317829 |
| 2         | -0.999236404 | 0.0177908476 | 0.0243120372 |

|    |              |     |             |                        |
|----|--------------|-----|-------------|------------------------|
| 1  | 0.8149677513 | 105 | <b>8058</b> | ADC_(a,b,c,d,e)        |
| 2  | 0.8114857718 | 73  | <b>8166</b> | GMG_(a,b,c,d)          |
| 3  | 0.7678769051 | 53  | <b>8066</b> | PulseWid2_(a,b,c,d)    |
| 4  | 0.7678769051 | 23  | <b>8068</b> | IntermedPk_(a,b,c,d)   |
| 5  | 0.7678451318 | 42  | <b>8070</b> | EquilPk_(a,b,c,d,e)    |
| 6  | 0.7663722546 | 27  | <b>8062</b> | LgstcPowPk_(a,b,c,d)   |
| 7  | 0.7660176955 | 75  | <b>8164</b> | EMG_(a,b,c,d)          |
| 8  | 0.7645280231 | 62  | <b>8182</b> | ChiSq_(a,b,c,d)        |
| 9  | 0.7644709523 | 57  | <b>8064</b> | PulsePow_(a,b,c,d)     |
| 10 | 0.7529455641 | 34  | <b>8050</b> | Gamma_(a,b,c,d)        |
| 11 | 0.7349939061 | 31  | <b>8174</b> | LogNorm4_(a,b,c,d)     |
| 12 | 0.7009778927 | 76  | <b>8052</b> | Weibull_(a,b,c,d)      |
| 13 | 0.6545237561 | 70  | <b>8186</b> | Pearson IV_(a,b,c,d,e) |
| 14 | 0.6480059927 | 97  | <b>8184</b> | FVar_(a,b,c,d,e)       |
| 15 | 0.3764707236 | 49  | <b>8180</b> | InvGamma_(a,b,c,d)     |
| 16 | 0.3662982779 | 16  | <b>8036</b> | Pulse_(a,b,c)          |
| 17 | 0.3591277391 | 24  | <b>8033</b> | ExtrVal_(a,b,c)        |
| 18 | 0.3530441312 | 32  | <b>8178</b> | ExtrVal4F_(a,b,c,d)    |
| 19 | 0.2219458490 | 79  | <b>8054</b> | Beta_(a,b,c,d,e)       |
| 20 | 0.2210226821 | 33  | <b>8056</b> | ADS_(a,b,c,d,e)        |
