# Supplementary material for: Human Ovarian Reserve from Conception to the Menopause
Source: PubMed Central journal article supplement (PMC2811725; doi:10.1371/journal.pone.0008772), 2010-01-27
Supplement: pone.0008772.s002.pdf [file pone.0008772.s002.pdf]

## Model robustness analysis.

It is possible that the ADC model is highest ranked for the total dataset, but that some other model would be higher ranked in general for similar datasets to our combined histological data. In order to check this, the peak function models were ranked 61 times on datasets consisting of the original 325 points minus 50 points chosen at random. Two models were consistently highly ranked: the ADC and GMG models. The mean  $r^2$  coefficients obtained over the multiple runs were compared for a statistically significant difference. The results are given in the table below.

| Model ID | Runs | Mean $r^2$ | Std Dev of $r^2$ | Min. $r^2$ | Max. $r^2$ |
|----------|------|------------|------------------|------------|------------|
| 8058-ADC | 61   | 0.805      | 0.014            | 0.773      | 0.824      |
| 8166-GMG | 61   | 0.796      | 0.021            | 0.738      | 0.821      |
| 8066     | 61   | 0.762      | 0.010            | 0.747      | 0.783      |
| 8068     | 61   | 0.762      | 0.010            | 0.747      | 0.783      |
| 8062     | 61   | 0.761      | 0.010            | 0.745      | 0.781      |
| 8164     | 61   | 0.760      | 0.010            | 0.745      | 0.781      |
| 8182     | 61   | 0.756      | 0.009            | 0.741      | 0.773      |
| 8184     | 61   | 0.752      | 0.010            | 0.721      | 0.771      |
| 8070     | 61   | 0.747      | 0.092            | 0.224      | 0.783      |
| 8064     | 61   | 0.740      | 0.101            | 0.343      | 0.796      |
| 8174     | 61   | 0.730      | 0.013            | 0.674      | 0.752      |
| 8052     | 61   | 0.699      | 0.080            | 0.497      | 0.776      |
| 8050     | 61   | 0.688      | 0.037            | 0.599      | 0.737      |
| 8186     | 61   | 0.651      | 0.011            | 0.635      | 0.673      |
| 8180     | 61   | 0.360      | 0.011            | 0.337      | 0.379      |
| 8036     | 61   | 0.341      | 0.009            | 0.325      | 0.362      |
| 8033     | 61   | 0.332      | 0.010            | 0.316      | 0.353      |
| 8178     | 61   | 0.324      | 0.010            | 0.308      | 0.346      |
| 8054     | 61   | 0.305      | 0.266            | 0.017      | 0.734      |
| 8056     | 61   | 0.179      | 0.028            | 0.074      | 0.223      |

T-test analysis of difference of the two highest-ranked means:  
 ADC model mean: 0.805 (sd=0.014) (se=0.0018)  
 GMG model mean: 0.796 (sd=0.021) (se=0.0027)

Difference between means:  
 0.009 (sd=0.033) (se=0.0032)  
 95% CI: 0.0027<diff<0.0153 (Wald)

t-value of difference: 2.785; df-t: 104  
 Probability: 0.996754 (left tail pr: 0.00325)  
 Doublesided p-value: 0.0065
